# Supplementary material
Source: PubMed Central journal article supplement (PMC7958435)
Supplement: pnas.2020858118.sapp.pdf [file pnas.2020858118.sapp.pdf]

## **Supplementary Info:**

### **Monocyte markers correlate with immune and neuronal brain changes in REM Sleep Behaviour Disorder**

Kristine Farmen, Sara K. Nissen, Morten G. Stokholm, Alex Iranzo, Karen Østergaard, Mónica Serradell, Marit Otto, Kristina B. Svendsen, Alicia Garrido, Dolores Vilas, Per Borghammer, Joan Santamaria, Arne Møller, Carles Gaig, David J. Brooks, Eduardo Tolosa, Nicola Pavese and Marina Romero-Ramos.

## Flow cytometry gating strategy

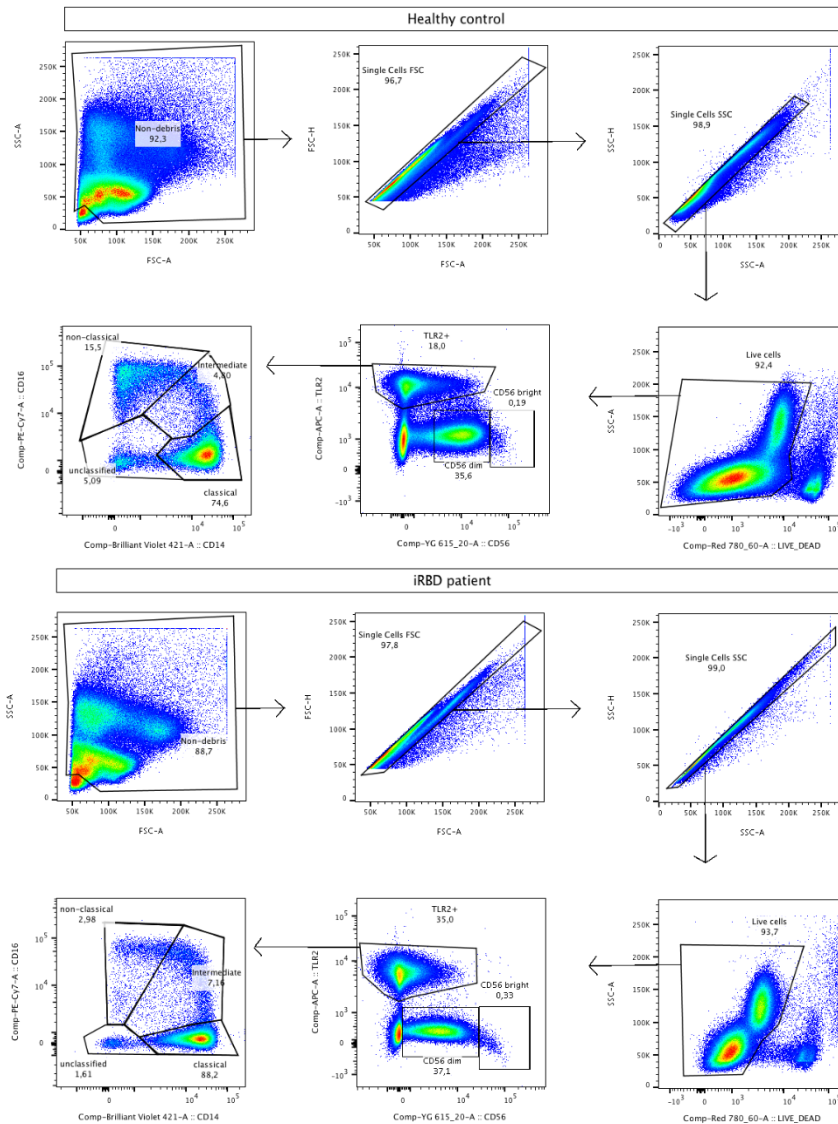

**Supplementary figure 1. Flow cytometry gating strategy used for identification of mononuclear phagocytes and natural killer cells in PBMCs.** PBMCs were analysed by flow cytometry. Representative plots are shown for a healthy control (upper panel) and an iRBD patient (lower panel). Arrows indicate the pre-gated population and subsequent analysis. Debris was excluded based on FSC and SSC followed by a double exclusion of doublets by first FSC and then SSC area (A) versus height (H). Dead cells were excluded using fixable Near-IR Dead Cell Stain Kit. The natural killer (NK) cell-specific marker CD56 was used together with TLR2, a pan monocyte marker expressed in Mo&DCs, to separate the monocytes (TLR2<sup>+</sup>) and NK cells (TLR2<sup>-</sup>/CD56<sup>dim/bright</sup>). The separation between the CD56 dim and bright populations were aided by CD16 expression differences (by heatmap) on these cells (Supp.Fig2A,B (HC) and Supp.Fig2G,H (iRBD)). Finally, the separation into subpopulations of Mo&DCs was done based on their different expression of the CD14 and CD16 markers. CD14<sup>++</sup>/CD16<sup>-</sup> corresponds to classical monocytes, CD14<sup>++</sup>/CD16<sup>+</sup> corresponds to intermediate monocytes, CD14<sup>low</sup>/CD16<sup>++</sup> corresponds to non-classical monocytes and CD14<sup>low</sup>/CD16<sup>-</sup> corresponds to “unclassified” monocytes thus dendritic cells (DCs). The separation between monocyte subpopulations were also based on differences in HLA-DR surface expression (by heatmap) (Supp.Fig2C (HC) and Supp.Fig2I (iRBD)).

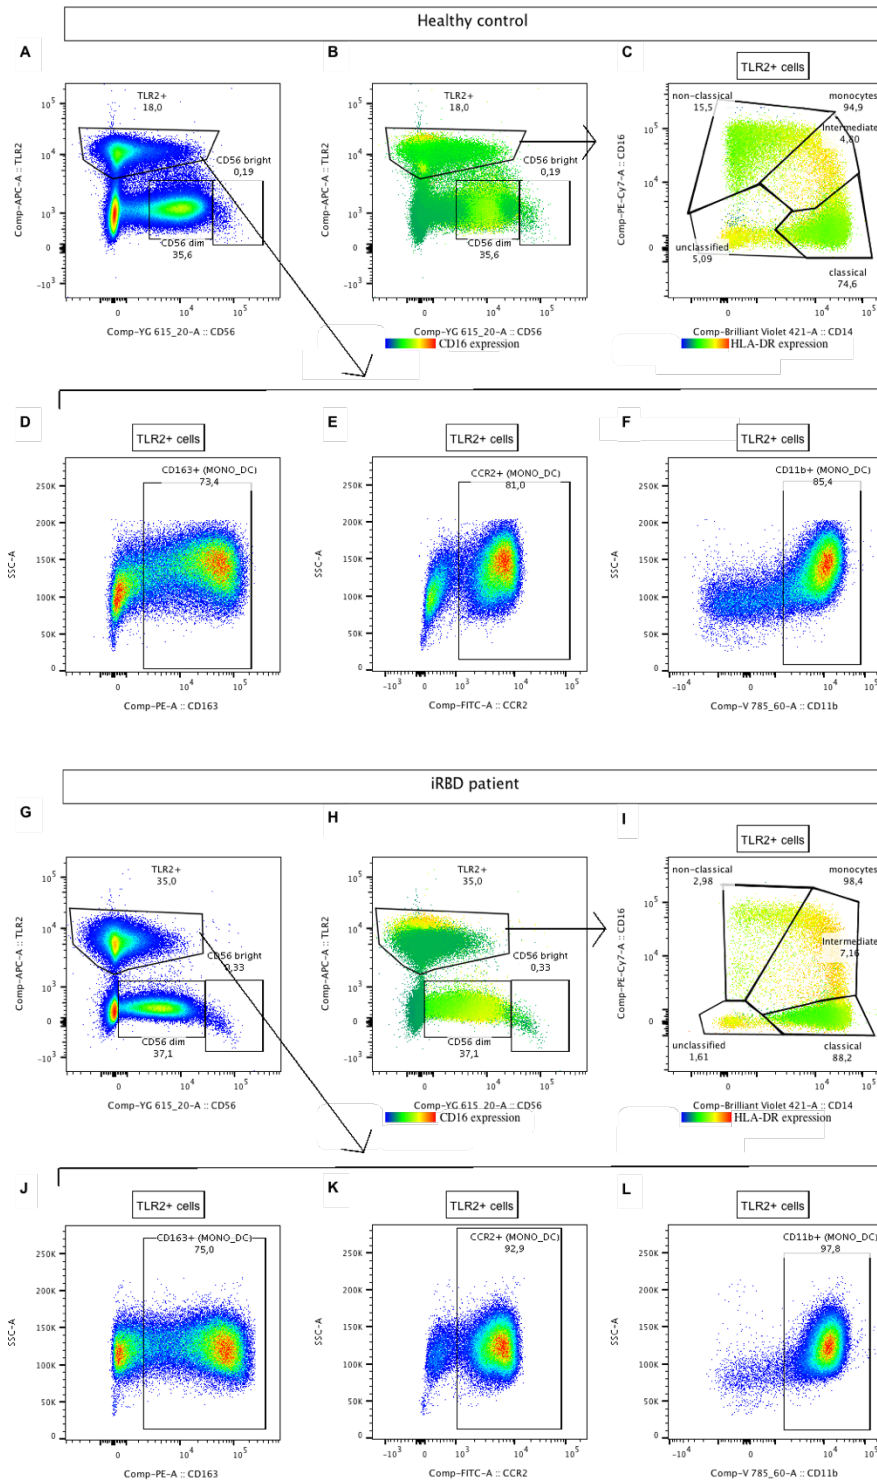

**Supplementary figure 2. Gating strategy for separation of NK subpopulations, monocyte subpopulations and Mo&DCs expression of receptors.** Representative plots are shown for a healthy control (upper panel A-F) and an iRBD patient (lower panel G-L). Arrows indicate the pre-gated population and subsequent analysis. **A,G** The exact separation of CD56<sup>+</sup> natural killer (NK) cells into precursor (CD56 bright) and mature (CD56 dim) NK cells were based on their expression of CD56 aided by **B,H** CD16 heat-mapping (highest in the CD56dim population). Pre-gated TLR2<sup>+</sup> cells were further analysed based on the **C,I** CD14 and CD16 expression and the separation of monocyte subpopulations and dendritic cells (DC) (“unclassified monocytes”) were based on their surface expression of HLA-DR evaluated by heat-mapping. In addition, pre-gated TLR2<sup>+</sup> were analysed for the expression of the following immune marker (representative plots are shown for the gating): **D,J** CD163<sup>+</sup>, **E,K** CD11b<sup>+</sup> and **F,L** CCR2<sup>+</sup>. The gates were set based on FMO controls.

ANALYSIS OF COVARIANCE:

| Linear regression   | Dependent variable          | Independent variable | Estimate | Std Error | t Ratio | Prob > t       | Lower 95% | Upper 95% |
|---------------------|-----------------------------|----------------------|----------|-----------|---------|----------------|-----------|-----------|
| Simple regression   | % CD163 <sup>+</sup> (live) | SN PK L              | -31.86   | 9.366     | -3.40   | <b>0.0059*</b> | -52.47    | -11.24    |
| Simple regression   | % CD163 <sup>+</sup> (live) | SN PK R              | -25.37   | 7.381     | -3.44   | <b>0.0056*</b> | -41.61    | -9.120    |
| Simple regression   | % CD163 <sup>+</sup> (live) | Putamen DOPA L       | 2394     | 949.6     | 2.52    | <b>0.0284*</b> | 304.1     | 4484      |
| Simple regression   | % CD163 <sup>+</sup> (live) | Age at visit         | -0.016   | 0.353     | -0.05   | 0.965          | -0.794    | 0.762     |
| Simple regression   | % CD163 <sup>+</sup> (live) | Disease duration     | -0.001   | 0.607     | -0.00   | 0.999          | -1.338    | 1,335     |
| Multiple regression | % CD163 <sup>+</sup> (live) | SN PK L              | -39.43   | 10.06     | -3.92   | <b>0.0035*</b> | -62.19    | -16.67    |
|                     |                             | Age at visit         | 0.320    | 0.265     | 1.21    | 0.2572         | -0.279    | 0.920     |
|                     |                             | Disease duration     | 0.394    | 0.441     | 0.89    | 0.396          | -0.605    | 1.392     |
| Multiple regression | % CD163 <sup>+</sup> (live) | SN PK R              | -33.63   | 7.656     | -4.39   | <b>0.0017*</b> | -50.95    | -16.31    |
|                     |                             | Age at visit         | 0.365    | 0.248     | 1.47    | 0.176          | -0.197    | 0.926     |
|                     |                             | Disease duration     | 0.534    | 0.417     | 1.28    | 0.2331         | -0.410    | 1.476     |
| Multiple regression | % CD163 <sup>+</sup> (live) | Putamen DOPA L       | 2714     | 1073      | 2.53    | <b>0.0323*</b> | 286.2     | 5142      |
|                     |                             | Age at visit         | -0.044   | 0.315     | -0.14   | 0.893          | -0.757    | 0.670     |
|                     |                             | Disease duration     | 0.494    | 0.574     | 0.86    | 0.4119         | -0.805    | 1.794     |

**Supplementary Table 1: Simple linear and multiple linear regressions were calculated to predict frequencies of CD163<sup>+</sup> cells (of live cells) for iRBD patients based on BP <sup>11</sup>C-PK11195 in SN L & R or Ki <sup>18</sup>F-DOPA in Putamen L alone or adjusted for age and disease duration.**

Estimate of slope ( $\beta$ )/model coefficients with standard (Std) errors, the t ratio of the estimate to the std error (t Ratio), the p values (Prob >|t|), and the 95% lower and upper confidence limit for the parameter estimate are shown for simple linear regression or multiple regression analyses. Significant p values are marked with \*.

| Linear regression   | Dependent variable | Independent variable | Estimate | Std Error | t Ratio | Prob > t       | Lower 95% | Upper 95% |
|---------------------|--------------------|----------------------|----------|-----------|---------|----------------|-----------|-----------|
| Simple regression   | MFI TLR4 (C)       | SN PK L              | 3821     | 1127      | 3.39    | <b>0.0048*</b> | 1387      | 6254      |
| Simple regression   | MFI TLR4 (C)       | SN PK R              | 2526     | 975,1     | 2.59    | <b>0.0224*</b> | 419,1     | 4632      |
| Simple regression   | MFI TLR4 (C)       | Putamen DOPA L       | -324468  | 103799    | -3.13   | <b>0.0080*</b> | -548711   | -100224   |
| Simple regression   | MFI TLR4 (C)       | Putamen DOPA R       | -244237  | 124837    | -1.96   | 0.0722         | -513931   | 25457     |
| Simple regression   | MFI TLR4 (C)       | Age at visit         | 27.43    | 39.15     | 0.7     | 0.4958         | -57.14    | 112.0     |
| Simple regression   | MFI TLR4 (C)       | Disease duration     | 116.9    | 61.34     | 1.91    | 0.0791         | -15.63    | 249.4     |
| Simple regression   | MFI TLR4 (NC)      | Putamen DOPA L       | -144924  | 50812     | -2.85   | <b>0.0136*</b> | -254697   | -35152    |
| Simple regression   | MFI TLR4 (NC)      | Putamen DOPA R       | -140149  | 54551     | -2.57   | <b>0.0233*</b> | -257999   | -22299    |
| Simple regression   | MFI TLR4 (NC)      | Age at visit         | 3.838    | 18.78     | 0.2     | 0.841          | -36.73    | 44.40     |
| Simple regression   | MFI TLR4 (NC)      | Disease duration     | 52.52    | 29.30     | 1.79    | 0.0963         | -10.77    | 115.8     |
| Multiple regression | MFI TLR4 (C)       | SN PK L              | 3598     | 1255      | 2.87    | <b>0.0153*</b> | 835.4     | 6362      |
|                     |                    | Age at visit         | -20.37   | 31.84     | -0.64   | 0.5355         | -90.45    | 49.72     |
|                     |                    | Disease duration     | 75.02    | 53.76     | 1.4     | 0.1904         | -43.30    | 193.3     |
| Multiple regression | MFI TLR4 (C)       | SN PK R              | 2723     | 1137      | 2.4     | <b>0.0338*</b> | 246.4     | 5200      |
|                     |                    | Age at visit         | -14.25   | 37.76     | -0.38   | 0.7126         | -96.52    | 68.03     |
| Multiple regression | MFI TLR4 (C)       | SN PK R              | 2081     | 1008      | 2.07    | 0.0612         | -114.1    | 4276      |
|                     |                    | Disease duration     | 76.49    | 58.22     | 1.31    | 0.2135         | -50.36    | 203.3     |
| Multiple regression | MFI TLR4 (C)       | SN PK R              | 2344     | 1137      | 2.06    | 0.0637         | -158.5    | 4846      |
|                     |                    | Age at visit         | -20.83   | 36.90     | -0.56   | 0.5837         | -102.0    | 60.38     |
|                     |                    | Disease duration     | 81.04    | 60.48     | 1.34    | 0.2073         | -52.09    | 214.2     |
| Multiple regression | MFI TLR4 (C)       | Putamen DOPA L       | -278390  | 112783    | -2.47   | <b>0.0312*</b> | -526625   | -30156    |
|                     |                    | Age at visit         | 12.04651 | 31.81     | 0.38    | 0.7121         | -57.97    | 82.06     |
|                     |                    | Disease duration     | 62.02    | 58.93     | 1.05    | 0.3151         | -67.68    | 191.7     |
| Multiple regression | MFI TLR4 (NC)      | Putamen DOPA L       | -123369  | 55945     | -2.21   | <b>0.0496*</b> | -246504   | -233.5    |
|                     |                    | Age at visit         | -3.735   | 15.78     | -0.24   | 0.8172         | -38.46    | 30.99     |
|                     |                    | Disease duration     | 32.41    | 29.23     | 1.11    | 0.2912         | -31.93    | 96.75     |
| Multiple regression | MFI TLR4 (NC)      | Putamen DOPA R       | -142383  | 57635     | -2.47   | <b>0.0295*</b> | -267960   | -16807    |
|                     |                    | Age at visit         | -3.444   | 16.18     | -0.21   | 0.835          | -38.70    | 31.82     |
| Multiple regression | MFI TLR4 (NC)      | Putamen DOPA R       | -117005  | 57271     | -2.04   | 0.0637         | -241789   | 7779      |
|                     |                    | Disease duration     | 32.85    | 27.98     | 1.17    | 0.2631         | -28.10    | 93.80     |
| Multiple regression | MFI TLR4 (NC)      | Putamen DOPA R       | -119857  | 59502     | -2.01   | 0.0691         | -250820   | 11106     |
|                     |                    | Age at visit         | -7.796   | 16.27     | -0.48   | 0.6413         | -43.61    | 28.02     |
|                     |                    | Disease duration     | 35.98    | 29.65     | 1.21    | 0.2503         | -29.28    | 101.2     |

**Supplementary Table 2: Linear and multiple linear regressions were calculated to predict MFI TLR4 on classical and non-classical monocytes for iRBD patients based on BP 11C-PK11195 in SN L&R or Ki 18F-DOPA in Putamen L&R alone or adjusted for age and disease duration.**

Estimate of slope ( $\beta$ )/model coefficients with standard (Std) errors, the t ratio of the estimate to the std error (t-Ratio), the p values (Prob >|t|), and the 95% lower and upper confidence limit for the parameter estimate are shown for simple linear regression or multiple regression analyses. Significant p values are marked with \* p<0.05.

| Linear regression   | Dependent variable | Independent variable | Estimate | Std Error | t Ratio | Prob > t        | Lower 95% | Upper 95% |
|---------------------|--------------------|----------------------|----------|-----------|---------|-----------------|-----------|-----------|
| Simple regression   | MFI TLR2 Mo&DCs    | UPSIT                | -180.9   | 49.77     | -3.63   | <b>0.0030**</b> | -288.4    | -73.39    |
| Simple regression   | MFI TLR2 Mo&DCs    | Age at visit         | 37.51    | 96.37     | 0.39    | 0.7034          | -170.7    | 245.7     |
| Simple regression   | MFI TLR2 Mo&DCs    | Disease duration     | 56.66    | 167.9     | 0.34    | 0.7411          | -306.1    | 419.4     |
| Multiple regression | MFI TLR2 Mo&DCs    | UPSIT                | -207.9   | 52.27     | -3.98   | <b>0.0022**</b> | -323.0    | -92.85    |
|                     |                    | Age at visit         | -44.67   | 72.01     | -0.62   | 0.5477          | -203.2    | 113.8     |
|                     |                    | Disease duration     | 201.4    | 127.3     | 1.58    | 0.1418          | -78.68    | 481.6     |

**Supplementary table 3. Simple linear and multiple linear regressions were calculated to MFI TLR2 (Mo&DCs) for iRBD patients based on UPSIT score alone or adjusted for age and disease duration.**

Estimate of slope ( $\beta$ )/model coefficients with standard (Std) errors, the t ratio of the estimate to the std error (t-Ratio), the p values (Prob >|t|), and the 95% lower and upper confidence limit for the parameter estimate are shown for simple linear regression or multiple regression analyses. Significant p values are marked with \*\* p<0.01.
